# Supplementary material for: An Internet-Based Multi-Approach Intervention Targeting University Students Suffering from Psychological Problems: Design, Implementation, and Evaluation
Source: MDPI journal article supplement (doi:10.3390/ijerph19052711), 2022-02-25
Supplement: s1 [file s1]

| Control Condition (N = 100) |                                                                                                                                                                                                                                                                                                                                         | MindBlooming Intervention (N = 100) |                                                                                                                                                                                                                                                                                                                                                                                                                                 |
|-----------------------------|-----------------------------------------------------------------------------------------------------------------------------------------------------------------------------------------------------------------------------------------------------------------------------------------------------------------------------------------|-------------------------------------|---------------------------------------------------------------------------------------------------------------------------------------------------------------------------------------------------------------------------------------------------------------------------------------------------------------------------------------------------------------------------------------------------------------------------------|
| <b>T0</b>                   | <ul style="list-style-type: none"> <li>- Written introduction</li> <li>- Global screening</li> <li>- Screening results: assignment of two areas of distress XY               <ul style="list-style-type: none"> <li>X = area of distress 1</li> <li>Y = area of distress 2</li> </ul> </li> </ul> <p><i>After three days (max):</i></p> | <b>T0</b>                           | <ul style="list-style-type: none"> <li>- Written and video introduction</li> <li>- Global screening</li> <li>- Screening results: assignment of two modules XY               <ul style="list-style-type: none"> <li>X = module 1</li> <li>Y = module 2</li> </ul> </li> </ul> <p><i>After three days (max):</i></p>                                                                                                             |
| <b>WEEK 1</b>               | <p>Educational material and resources on Qualtrics</p> <p>- Weekly screening about two areas of distress XY</p>                                                                                                                                                                                                                         | <b>WEEK 1</b>                       | <p>Psychoeducation XY</p> <p>Exercises WEEK1 X</p> <p>Exercises WEEK1 Y</p> <ul style="list-style-type: none"> <li>• Day 1 – Daily screening</li> <li>• Day 2 – Daily screening</li> <li>• Day 3 – Daily screening</li> <li>• Day 4 – Daily screening</li> <li>• Day 5 – Daily screening</li> <li>• Day 6 – Daily screening</li> <li>• Day 7 – Daily screening</li> </ul> <p>- Weekly screening about two modules XY</p>        |
| <b>WEEK 2</b>               | <p>- Weekly screening about two areas of distress XY</p>                                                                                                                                                                                                                                                                                | <b>WEEK 2</b>                       | <p>Psychoeducation XY</p> <p>Exercises WEEK2 X</p> <p>Exercises WEEK2 Y</p> <ul style="list-style-type: none"> <li>• Day 8 – Daily screening</li> <li>• Day 9 – Daily screening</li> <li>• Day 10 – Daily screening</li> <li>• Day 11 – Daily screening</li> <li>• Day 12 – Daily screening</li> <li>• Day 13 – Daily screening</li> <li>• Day 14 – Daily screening</li> </ul> <p>- Weekly screening about two modules XY</p>   |
| <b>WEEK 3</b>               | <p>- Weekly screening about two areas of distress XY</p>                                                                                                                                                                                                                                                                                | <b>WEEK 3</b>                       | <p>Psychoeducation XY</p> <p>Exercises WEEK3 X</p> <p>Exercises WEEK3 Y</p> <ul style="list-style-type: none"> <li>• Day 15 – Daily screening</li> <li>• Day 16 – Daily screening</li> <li>• Day 17 – Daily screening</li> <li>• Day 18 – Daily screening</li> <li>• Day 19 – Daily screening</li> <li>• Day 20 – Daily screening</li> <li>• Day 21 – Daily screening</li> </ul> <p>- Weekly screening about two modules XY</p> |
| <b>WEEK 4</b>               | <p>- Weekly screening about two areas of distress XY</p>                                                                                                                                                                                                                                                                                | <b>WEEK 4</b>                       | <p>Psychoeducation XY</p> <p>Exercises WEEK4 X</p> <p>Exercises WEEK4 Y</p> <ul style="list-style-type: none"> <li>• Day 22 – Daily screening</li> <li>• Day 23 – Daily screening</li> <li>• Day 24 – Daily screening</li> <li>• Day 25 – Daily screening</li> <li>• Day 26 – Daily screening</li> <li>• Day 27 – Daily screening</li> <li>• Day 28 – Daily screening</li> </ul> <p>- Weekly screening about two modules XY</p> |

| Control Condition (N = 100) |                                                                         |                | MindBlooming Intervention (N = 100) |                                                                                                                                                                                                                                                                                                                                                                                 |  |
|-----------------------------|-------------------------------------------------------------------------|----------------|-------------------------------------|---------------------------------------------------------------------------------------------------------------------------------------------------------------------------------------------------------------------------------------------------------------------------------------------------------------------------------------------------------------------------------|--|
| <b>WEEK 5</b>               |                                                                         |                | <b>WEEK 5</b>                       | Psychoeducation XY<br>Exercises WEEK5 X<br>Exercises WEEK5 Y<br><ul style="list-style-type: none"> <li>Day 29 – Daily screening</li> <li>Day 30 – Daily screening</li> <li>Day 31 – Daily screening</li> <li>Day 32 – Daily screening</li> <li>Day 33 – Daily screening</li> <li>Day 34 – Daily screening</li> <li>Day 35 – Daily screening</li> </ul>                          |  |
|                             | – Weekly screening about two areas of distress XY                       |                |                                     | – Weekly screening about two modules XY                                                                                                                                                                                                                                                                                                                                         |  |
| <b>WEEK 6</b>               |                                                                         |                | <b>WEEK 6</b>                       | Psychoeducation about the relational problem module (for everyone)<br>Exercises WEEK6<br><ul style="list-style-type: none"> <li>Day 36 – Daily screening</li> <li>Day 37 – Daily screening</li> <li>Day 38 – Daily screening</li> <li>Day 39 – Daily screening</li> <li>Day 40 – Daily screening</li> <li>Day 41 – Daily screening</li> <li>Day 42 – Daily screening</li> </ul> |  |
|                             | – Weekly screening about two areas of distress XY and relational issues |                |                                     | – Weekly screening about two modules XY and relational problems                                                                                                                                                                                                                                                                                                                 |  |
| <b>WEEK 7</b>               |                                                                         |                | <b>WEEK 7</b>                       | Psychoeducation XY<br>Exercises WEEK7 XY (recap and maintenance)<br><ul style="list-style-type: none"> <li>Day 43 – Daily screening</li> <li>Day 44 – Daily screening</li> <li>Day 45 – Daily screening</li> <li>Day 46 – Daily screening</li> <li>Day 47 – Daily screening</li> <li>Day 48 – Daily screening</li> <li>Day 49 – Daily screening</li> </ul>                      |  |
|                             | – Weekly screening about two areas of distress XY                       |                |                                     | – Weekly screening about two modules XY                                                                                                                                                                                                                                                                                                                                         |  |
| <b>T1</b>                   | – Global screening*<br>+ CSQ-8 and SUS                                  | POST TREATMENT | <b>T1</b>                           | – Global screening*<br>+ CSQ-8 and SUS                                                                                                                                                                                                                                                                                                                                          |  |
| <b>T2</b>                   | – Global screening*                                                     | 12 WEEKS AFTER | <b>T2</b>                           | – Global screening*                                                                                                                                                                                                                                                                                                                                                             |  |
| <b>T3</b>                   | – Global screening*                                                     | 24 WEEKS AFTER | <b>T3</b>                           | – Global screening*                                                                                                                                                                                                                                                                                                                                                             |  |

Global screening\* = except inclusion/exclusion criteria and socio-demographic questions
